# Supplementary material
Source: publisher figshare collection journal article supplement (https://wiley.figshare.com/articles/dataset/_/3514229)
Supplement: Supplementary file 1 [file 1 › appendix-A.htm]

Ecological Archives A019-032-A1


### *Ecological Archives* A019-032-A1

### **Melissa L. Snover and Selina S. Heppell. 2009. Application of diffusion approximation for risk assessments of sea turtle populations. *Ecological Applications* 19:774–785.**

Appendix A. Details of the diffusion approximation method. Click here for a PDF file of the appendix.

---


[Back to A019-032]
